# Supplementary material for: Cardiovascular Profile of South African Adults with Low-Level Viremia during Antiretroviral Therapy
Source: MDPI journal article supplement (doi:10.3390/jcm11102812), 2022-05-16
Supplement: s1 [file s1]

**Supplementary Table S1.** Difference in cardiovascular measures and biomarker levels between people with low-level viremia (LLV) and suppressed viremia, stratified by sex.

|                                      | Women              |                     |                 |      | Men                |                     |                 |      |
|--------------------------------------|--------------------|---------------------|-----------------|------|--------------------|---------------------|-----------------|------|
|                                      | SV<br><i>n</i> =81 | LLV<br><i>n</i> =72 | <i>P</i> -value | B-H  | SV<br><i>n</i> =32 | LLV<br><i>n</i> =23 | <i>P</i> -value | B-H  |
| Age (years)                          | 44.0 (34.5;51.0)   | 43.0 (35.3;49.0)    | 0.98            | 0.98 | 48.0 (43.0;53.0)   | 44.0 (37.0;48.0)    | 0.073           | 0.73 |
| Body mass index (kg/m <sup>2</sup> ) | 26.9 (22.9;32.0)   | 26.3 (22.8;32.3)    | 0.84            | 0.98 | 20.4 (17.9;22.8)   | 20.3 (18.2;23.7)    | 0.99            | 0.99 |
| <b>Cardiovascular measures</b>       |                    |                     |                 |      |                    |                     |                 |      |
| Brachial SBP (mmHg)                  | 114 (106;131)      | 114 (103;131)       | 0.74            | 0.98 | 123 (106;130)      | 113 (108;121)       | 0.13            | 0.73 |
| Brachial DBP (mmHg)                  | 82 (75;88)         | 83 (74;94)          | 0.32            | 0.98 | 80 (73;91)         | 80 (74;88)          | 0.89            | 0.92 |
| Brachial MAP (mmHg)                  | 92 (85;104)        | 93 (83;106)         | 0.60            | 0.98 | 93 (86;105)        | 93 (85;98)          | 0.51            | 0.73 |
| Central SBP (mmHg)                   | 114 (108;131)      | 114 (107;130)       | 0.93            | 0.98 | 113 (103;132)      | 111 (99;118)        | 0.21            | 0.73 |
| Central pulse pressure (mmHg)        | 35 (30;41)         | 34 (29;42)          | 0.53            | 0.98 | 34 (26;37)         | 29 (27;33)          | 0.14            | 0.73 |
| Heart rate (beats/min)               | 69 (62;79)         | 72 (65;79)          | 0.40            | 0.98 | 69 (60;83)         | 66 (60;89)          | 0.77            | 0.88 |
| Pulse wave velocity (m/s)            | 7.30 (6.40;8.30)   | 7.30 (6.40;8.30)    | 0.87            | 0.98 | 8.30 (7.53;9.08)   | 8.10 (7.40;8.50)    | 0.19            | 0.73 |
| Pulse pressure amplification         | 1.32 (1.25;1.41)   | 1.32 (1.26;1.41)    | 0.90            | 0.98 | 1.42 (1.32;1.50)   | 1.39 (1.32;1.52)    | 0.75            | 0.88 |
| Carotid intima-media thickness (mm)  | 0.60 (0.56;0.64)   | 0.59 (0.57;0.64)    | 0.47            | 0.98 | 0.63 (0.59;0.69)   | 0.61 (0.57;0.69)    | 0.46            | 0.73 |
| Carotid diameter distensibility (%)  | 9.93 (7.16;12.8)   | 8.47 (6.53;12.4)    | 0.16            | 0.94 | 8.21 (5.07;11.9)   | 9.11 (4.63;12.0)    | 0.89            | 0.92 |
| Troponin-T, >3.00 (pg/ml)*           | 5.04 (3.78;5.88)   | 4.53 (3.46;5.84)    | 0.78            | 0.98 | 4.75 (3.62;11.0)   | 5.82 (4.12;11.5)    | 0.77            | 0.88 |
| NT-proBNP (pg/ml)                    | 52.1 (22.8;106.0)  | 46.8 (23.2;97.3)    | 0.84            | 0.98 | 51.3 (20.2;144.9)  | 21.5 (7.59;40.6)    | <b>0.007</b>    | 0.23 |
| <b>Other biomarkers</b>              |                    |                     |                 |      |                    |                     |                 |      |
| C-reactive protein (mg/l)            | 2.44 (1.27;7.51)   | 3.82 (0.97;8.84)    | 0.66            | 0.98 | 2.57 (0.91;7.76)   | 0.98 (0.40;4.43)    | 0.082           | 0.73 |
| Interleukin-6 (pg/ml)                | 2.44 (1.54;3.79)   | 2.83 (2.06;4.94)    | <b>0.034</b>    | 0.56 | 3.11 (1.70;4.82)   | 2.01 (0.75;3.21)    | 0.19            | 0.73 |
| ICAM-1 (ng/ml)                       | 26.6 (17.6;45.1)   | 26.6 (21.2;42.3)    | 0.57            | 0.98 | 41.0 (24.2;62.4)   | 38.7 (29.5;46.4)    | 0.75            | 0.88 |
| VCAM-1 (ng/ml)                       | 493 (363;625)      | 460 (367;609)       | 0.72            | 0.98 | 519 (388;600)      | 557 (476;740)       | 0.19            | 0.73 |
| P-selectin (ng/ml)                   | 26.9 (21.5;34.7)   | 26.3 (19.5;35.0)    | 0.74            | 0.98 | 31.5 (21.5;40.9)   | 33.9 (28.8;44.3)    | 0.23            | 0.73 |
| Myeloperoxidase (ng/ml)              | 66.8 (44.3;97.2)   | 55.9 (35.2;89.3)    | 0.061           | 0.67 | 70.3 (38.4;101.3)  | 85.9 (45.1;108.7)   | 0.49            | 0.73 |
| GDF-15 (ng/ml)                       | 0.55 (0.40;0.90)   | 0.63 (0.44;0.76)    | 0.63            | 0.98 | 0.86 (0.52;1.42)   | 0.78 (0.66;1.16)    | 0.49            | 0.73 |
| ADAMTS13 (ng/ml)                     | 401 (340;469)      | 398 (362;458)       | 0.78            | 0.98 | 397 (296;512)      | 431 (342;499)       | 0.55            | 0.76 |
| Reactive oxygen species (Units)      | 205 (159;242)      | 218 (175;250)       | 0.12            | 0.94 | 205 (167;264)      | 205 (163;301)       | 0.58            | 0.77 |
| Cholesterol (mmol/l)                 | 2.90 (2.39;3.76)   | 2.93 (2.56;3.35)    | 0.89            | 0.98 | 2.65 (2.19;3.28)   | 2.98 (2.47;3.48)    | 0.30            | 0.73 |
| Triglycerides (mmol/l)               | 0.74 (0.56;1.09)   | 0.70 (0.49;1.07)    | 0.28            | 0.98 | 0.77 (0.53;1.22)   | 0.82 (0.55;1.46)    | 0.40            | 0.73 |
| Low-density lipoproteins (mmol/l)    | 1.80 (1.26;2.38)   | 1.72 (1.45;2.06)    | 0.74            | 0.98 | 1.59 (1.15;2.11)   | 1.65 (1.30;2.23)    | 0.44            | 0.73 |

|                                    |                  |                  |              |      |                   |                   |      |      |
|------------------------------------|------------------|------------------|--------------|------|-------------------|-------------------|------|------|
| High-density lipoproteins (mmol/l) | 1.03 (0.82;1.29) | 1.06 (0.81;1.36) | 0.91         | 0.98 | 1.09 (0.77;1.34)  | 0.98 (0.67;1.21)  | 0.28 | 0.73 |
| Apolipoprotein A (g/l)             | 1.16 (0.97;1.47) | 1.16 (1.00;1.38) | 0.95         | 0.98 | 1.17 (0.92;1.46)  | 1.12 (0.88;1.48)  | 0.49 | 0.73 |
| Apolipoprotein B (g/l)             | 0.60 (0.45;0.78) | 0.60 (0.49;0.74) | 0.66         | 0.98 | 0.59 (0.43;0.68)  | 0.58 (0.46;0.79)  | 0.42 | 0.73 |
| Glycated hemoglobin (%)            | 5.51 (5.19;5.76) | 5.35 (5.18;5.66) | 0.17         | 0.94 | 5.30 (5.07;5.62)  | 5.45 (5.17;5.66)  | 0.28 | 0.73 |
| Glucose (mmol/l)                   | 3.72 (3.31;4.38) | 3.40 (3.16;3.79) | <b>0.004</b> | 0.13 | 3.43 (3.15;3.76)  | 3.64 (3.23;4.22)  | 0.46 | 0.73 |
| Gamma-glutamyl transferase (U/l)   | 37.6 (24.2;78.0) | 33.7 (19.3;83.8) | 0.64         | 0.98 | 64.9 (38.1;126.5) | 60.6 (23.8;203.3) | 0.87 | 0.92 |
| eGFR (ml/min/1.73m <sup>2</sup> )  | 121 (108;131)    | 120 (109;131)    | 0.72         | 0.98 | 115 (107;128)     | 120 (106;127)     | 0.40 | 0.73 |

*P*-values were obtained with Mann-Whitney U tests and Pearson's  $\chi^2$  tests, respectively. Data expressed as median (25<sup>th</sup> - 75<sup>th</sup> percentile range) or a percentage of N.

\*Participants with levels above the detection limit (Troponin-T: *n*=51, viral load: *n*=166). Abbreviations: SV, suppressed viremia; B-H, Benjamini-Hochberg *p*-value, SBP, systolic blood pressure; DBP, diastolic blood pressure; MAP, mean arterial pressure; NT-proBNP, N-terminal pro b-type natriuretic peptide; ICAM-1, intercellular adhesion molecule-1; VCAM-1, vascular cell adhesion molecule-1; GDF-15, growth differentiation factor-15; ADAMTS13, a disintegrin and metalloproteinase with a thrombospondin type 1 motif, member 13; eGFR, estimated glomerular filtration rate.
